# Supplementary material
Source: PubMed Central journal article supplement (PMC6584711)
Supplement: jamaophthalmol-135-696-s001.pdf [file jamaophthalmol-135-696-s001.pdf]

## Supplementary Online Content

Schönbach EM, Wolfson Y, Strauss RW, et al; ProgStar Study Group. Macular sensitivity measured with microperimetry in Stargardt disease in the Progression of Atrophy Secondary to Stargardt Disease (ProgStar) Study: Report No. 7. *JAMA Ophthalmol*. Published May 25, 2017. doi:10.1001/jamaophthalmol.2017.1162

**eFigure 1:** Modified Humphrey 10-2 Pattern (68 Points) for Sensitivity Testing of the Macula.

**eFigure 2:** Correlation of Visual Acuity with Microperimetric Sensitivity.

**eTable 1:** Demographic Characteristics by Inclusion in the Analyses.

**eTable 2:** Macular Sensitivity in Stargardt Disease.

**eTable 3:** Macular Sensitivity in Stargardt Disease including Patients with Poor Pattern Placement.

**eTable 4:** Macular Sensitivity in Stargardt Disease and Its Association with Demographic Features including Patients with Poor Pattern Placement.

**eTable 5:** Macular Sensitivity in Stargardt Disease and Its Association with Visual Acuity including Patients with Poor Pattern Placement.

This supplementary material has been provided by the authors to give readers additional information about their work.

eFigure 1.

Title: Modified Humphrey 10-2 Pattern (68 Points) for Sensitivity Testing of the Macula.

Legend: The central 4 points were grouped as foveal (black background), the 12 perifoveal points of the blue ring were grouped as the inner ring (blue background) and the remaining 52 test locations fell into the outer ring (white background).

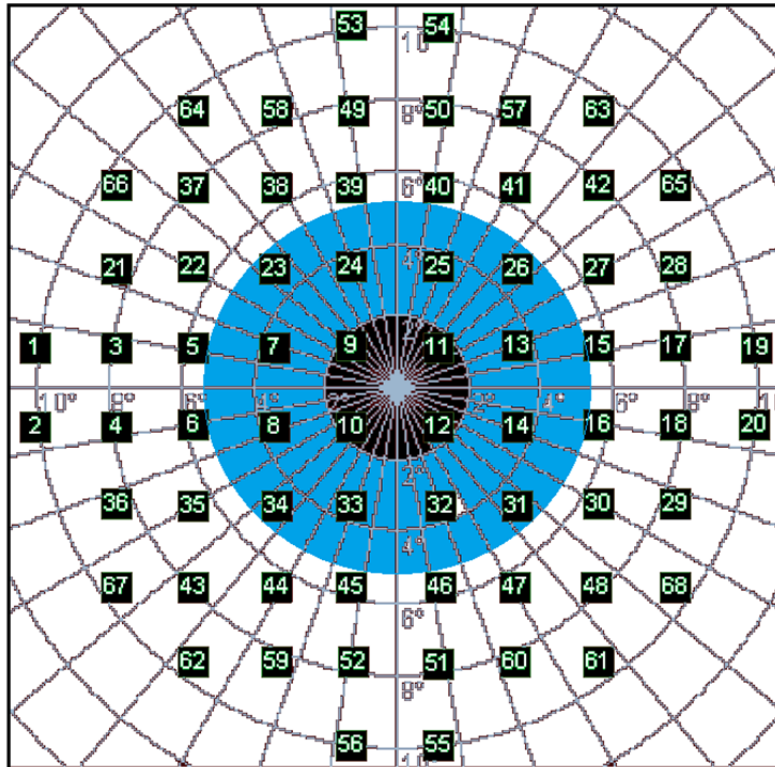

eFigure 2.

Title: Correlation of Visual Acuity with Microperimetric Sensitivity

Legend: Scatterplots showing the correlation between best-corrected visual acuity (BCVA) in ETDRS letter score with microperimetric sensitivity measured as the number of normal test locations, relatively scotomatous test locations, deeply scotomatous test locations, and mean sensitivity. Univariate linear regression analyses.

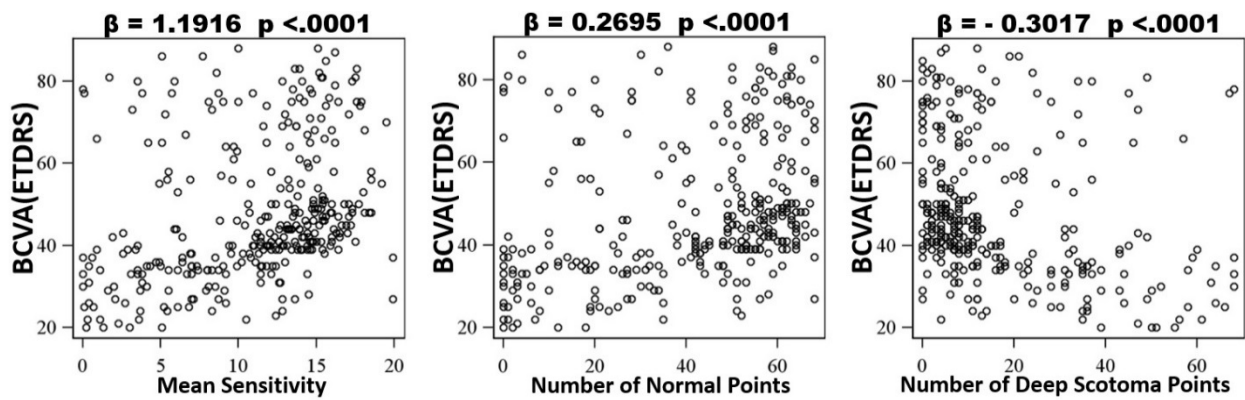

| Characteristic at baseline                              | Adequate and fair pattern placement in <b>at least one eye</b><br>N= 199<br>(63.8 % bilateral) | Poor or un-gradable pattern placement in <b>both eyes</b><br>N= 37 | All participants<br>N=236 | p-value* |
|---------------------------------------------------------|------------------------------------------------------------------------------------------------|--------------------------------------------------------------------|---------------------------|----------|
| <b>Person level</b>                                     |                                                                                                |                                                                    |                           |          |
| Age in years (mean (SD))                                | 34.2 (14.7)                                                                                    | 30.7 (17.5)                                                        | 33.6 (15.2)               | 0.20     |
| % Female                                                | 57.3                                                                                           | 48.7                                                               | 55.9                      | 0.33     |
| <b>Race</b>                                             |                                                                                                |                                                                    |                           |          |
| % Asian/South Asian                                     | 3.5                                                                                            | 5.4                                                                | 3.8                       | 0.02     |
| % African American                                      | 7.5                                                                                            | 13.5                                                               | 8.5                       |          |
| % White                                                 | 87.9                                                                                           | 73.0                                                               | 85.6                      |          |
| % Other                                                 | 1.0                                                                                            | 8.1                                                                | 2.1                       |          |
| <b>Age of disease onset** in years</b>                  |                                                                                                |                                                                    |                           |          |
| (Mean(SD))                                              | 22.7 (12.6)                                                                                    | 21.2 (14.4)                                                        | 22.5 (12.8)               | 0.53     |
| % ≤18 years                                             | 41.7                                                                                           | 43.2                                                               | 42.0                      | 0.10     |
| % >18                                                   | 52.8                                                                                           | 40.5                                                               | 50.8                      |          |
| % Unknown                                               | 5.0                                                                                            | 13.5                                                               | 6.4                       |          |
| % Asymptomatic                                          | 0.5                                                                                            | 2.7                                                                | 0.8                       |          |
| Duration of Disease** (mean(SD))                        | 12.0 (9.5)                                                                                     | 10.1 (9.2)                                                         | 11.7 (9.5)                | 0.30     |
| <b>Eye level</b>                                        |                                                                                                |                                                                    |                           |          |
|                                                         | Eyes with adequate and fair N=326                                                              | Eyes with poor or un-gradable N=114                                | All eyes N=440            |          |
| Best-corrected visual acuity (ETDRS letters) (Mean(SD)) | 47.8 (16.9)                                                                                    | 41.1 (13.1)                                                        | 46.1 (16.3)               | <0.0001  |

eTable 1: Demographic Characteristics by Inclusion in the Analyses.

\* Chi-Square/t-test were performed as appropriate.

\*\* Duration & age of disease onset are missing for 15 participants.

SD= Standard Deviation

| Variable                | Foveal |                         | Inner ring |                         | Outer ring |                          | Overall |                           |
|-------------------------|--------|-------------------------|------------|-------------------------|------------|--------------------------|---------|---------------------------|
|                         | Median | (Mean± SD; Range)       | Median     | (Mean± SD; Range)       | Median     | (Mean± SD; Range)        | Median  | (Mean± SD; Range)         |
| Mean Sensitivity (dB)   | 0      | (2.69± 4.43; 0 to 20)   | 6.17       | (6.77± 5.81; 0 to 20)   | 14.46      | (12.66± 5.3; 0 to 19.92) | 12.4*   | (11.02± 4.97; 0 to 19.90) |
| Count                   |        |                         |            |                         |            |                          |         |                           |
| Deep scotoma points     | 4      | (2.94± 1.39; 0 to 4)    | 5          | (5.55± 4.39; 0 to 12)   | 0          | (7.67± 12.94; 0 to 52)   | 10      | (16.15± 16.88; 0 to 68)   |
| Relative scotoma points | 0      | (0.58± 0.87; 0 to 4)    | 2          | (2.29± 2.02; 0 to 12)   | 4          | (7.57± 8.55; 0 to 37)    | 8       | (10.43± 9.08; 0 to 43)    |
| Normal points           | 0      | (0.49± 1.03; 0 to 4)    | 3          | (4.16± 4.16; 0 to 12)   | 46         | (36.57± 17.36; 0 to 52)  | 49      | (41.25± 20.8; 0 to 68)    |
| Percentage of           |        |                         |            |                         |            |                          |         |                           |
| Deep scotoma points     | 100%   | (73 %± 35 %; 0 %-100 %) | 42 %       | (46 %± 37 %; 0 %-100 %) | 0%         | (15 %± 25 %; 0 %-100 %)  | 15%     | (24% ± 25%; 0% to 100%)   |
| Relative scotoma points | 0%     | (15 %± 22 %; 0 %-100 %) | 17 %       | (19 %± 18 %; 0 %-100 %) | 8%         | (15 %± 17 %; 0 %-71 %)   | 12%     | (15% ± 13%; 0% to 63%)    |
| Normal points           | 0%     | (12 %± 26 %; 0 %-100 %) | 25 %       | (35 %± 35 %; 0 %-100 %) | 89%        | (71 %± 33 %; 0 %-100 %)  | 72%     | (61%± 31%; 0% to 100%)    |

eTable 2. Macular Sensitivity in Stargardt Disease.

N= 323 eyes. \*N=322. SD= Standard Deviation

0  
1

2

| Variable              | Foveal |                          | Inner ring |                          | Outer ring |                          | Overall |                          |
|-----------------------|--------|--------------------------|------------|--------------------------|------------|--------------------------|---------|--------------------------|
|                       | Median | (Mean± SD; Range)        | Median     | (Mean± SD; Range)        | Median     | (Mean± SD; Range)        | Median  | (Mean± SD; Range)        |
| Mean Sensitivity (dB) | 0      | (2.9± 4.52; 0 to 20)     | 6.33       | (6.7± 5.68; 0 to 20)     | 14.04      | (12.4± 5.27; 0 to 19.92) | 12.1*   | (10.8± 4.97; 0 to 19.90) |
| Deep scotoma          | 4      | (2.9± 1.41; 0 to 4)      | 5          | (5.6± 4.3; 0 to 12)      | 1          | (8± 12.7; 0 to 52)       | 10**    | (16.5± 16.7; 0 to 68)    |
| Relative scotoma      | 0      | (0.61± 0.9; 0 to 4)      | 2          | (2.4± 2.1; 0 to 12)      | 5          | (8.3± 8.8; 0 to 41)      | 8**     | (11.1± 9.43; 0 to 46)    |
| Normal points         | 0      | (0.53± 1.1; 0 to 4)      | 3          | (4.1± 4.1; 0 to 12)      | 44         | (35.5± 17.5; 0 to 52)    | 48**    | (40.3± 20.99; 0 to 68)   |
| Deep scotoma          | 100 %  | (72 %± 35 %; 0 %- 100 %) | 42 %       | (47 %± 36 %; 0 %- 100 %) | 2 %        | (16 %± 25 %; 0 %- 100 %) | 15%     | 24%±25%; 0% to 100%)     |
| Relative scotoma      | 0 %    | (15 %± 22 %; 0 %- 100 %) | 17 %       | (19 %± 18 %; 0 %- 100 %) | 10 %       | (16 %± 17 %; 0 %- 79 %)  | 12%     | (16%±14%; 0% to 68%)     |
| Normal points         | 0 %    | (13 %± 26 %; 0 %- 100 %) | 25 %       | (35 %± 34 %; 0 %- 100 %) | 85 %       | (69 %± 34 %; 0 %- 100 %) | 71%     | (59%±31%; 0% to 100%)    |

3 eTable 3. Macular Sensitivity in Stargardt Disease including Patients with Poor  
 4 Pattern Placement.

5 N= 427 eyes. \*N= 405. \*\*N= 428. SD= Standard Deviation

6

| Outcome                      | Independent variable                   | All eyes with graded microperimetric testing |         |                       |                  |         |                       |
|------------------------------|----------------------------------------|----------------------------------------------|---------|-----------------------|------------------|---------|-----------------------|
|                              |                                        | Univariate                                   |         |                       | Multivariate     |         |                       |
|                              |                                        | $\beta$ estimate                             | p value | 95% Confidence Limits | $\beta$ estimate | p value | 95% Confidence Limits |
| Mean Sensitivity (in dB)*    | Current age (per year)                 | -0.074                                       | 0.0005  | (-0.11 to -0.03)      | -0.02            | 0.37    | (-0.076 to 0.028)     |
|                              | Current age $\geq$ 50 yrs              | -2.88                                        | 0.0004  | (-4.47 to -1.30)      |                  |         |                       |
|                              | Age of onset > 18 yrs                  | -0.12                                        | 0.87    | (-1.48 to 1.25)       |                  |         |                       |
|                              | Duration of Stargardt disease in years | -0.20                                        | <.0001  | (-0.27 to -0.14)      | -0.18            | <.0001  | (-0.27 to -0.093)     |
|                              | Male Gender                            | 0.58                                         | 0.39    | (-0.74 to 1.90)       |                  |         |                       |
|                              | Non-White Ethnicity                    | -0.40                                        | 0.67    | (-2.23 to 1.43)       |                  |         |                       |
| Count of Normal Points       | Current age (per year)                 | -0.30                                        | 0.0007  | (-0.47 to -0.13)      | -0.12            | 0.29    | (-0.3 to 0.097)       |
|                              | Current age $\geq$ 50 yrs              | -12.89                                       | 0.0001  | (-19.43 to -6.35)     |                  |         |                       |
|                              | Age of onset > 18 yrs                  | -0.70                                        | 0.81    | (-6.33 to 4.93)       |                  |         |                       |
|                              | Duration of Stargardt disease in years | -0.82                                        | <.0001  | (-1.10 to -0.53)      | -0.71            | 0.0001  | (-1.08 to -0.35)      |
|                              | Male Gender                            | 1.13                                         | 0.68    | (-4.31 to 6.57)       |                  |         |                       |
|                              | Non-White Ethnicity                    | 0.0096                                       | 0.998   | (-7.22 to 7.24)       |                  |         |                       |
| Count of Deep Scotoma Points | Current age (per year)                 | 0.27                                         | 0.0002  | (0.13 to 0.41)        | 0.082            | 0.30    | (-0.074 to 0.24)      |
|                              | Current age $\geq$ 50 yrs              | 9.42                                         | 0.0012  | (3.70 to 15.14)       |                  |         |                       |
|                              | Age of onset > 18 yrs                  | 1.24                                         | 0.59    | (-3.30 to 5.79)       |                  |         |                       |
|                              | Duration of Stargardt disease in years | 0.78                                         | <.0001  | (-0.06 to 0.17)       | 0.71             | <.0001  | (0.40 to 1.01)        |
|                              | Male Gender                            | -1.81                                        | 0.42    | (-6.18 to 2.56)       |                  |         |                       |
|                              | Non-White Ethnicity                    | 1.88                                         | 0.55    | (-4.29 to 8.05)       |                  |         |                       |

eTable 4. Macular Sensitivity in Stargardt Disease and Its Association with Demographic Features including Patients with Poor Pattern Placement. N=427 eyes. \*N=425.

| Independent variable | All eyes with graded microperimetric testing (N= 427) |         |                       |                  |         |                       |
|----------------------|-------------------------------------------------------|---------|-----------------------|------------------|---------|-----------------------|
|                      | Univariate                                            |         |                       | Multivariate     |         |                       |
|                      | $\beta$ estimate                                      | p value | 95% Confidence Limits | $\beta$ estimate | p value | 95% Confidence Limits |
| MS all points        | 1.12                                                  | <.0001  | (0.75 to 1.50)        |                  |         |                       |
| MS Fovea             | 0.87                                                  | <.0001  | (0.51 to 1.23)        | 0.48             | 0.0224  | (0.07 to 0.89)        |
| MS Inner ring        | 0.98                                                  | <.0001  | (0.66 to 1.30)        | 0.48             | 0.0508  | (-0.002 to 0.96)      |
| MS Outer ring        | 0.90                                                  | <.0001  | (0.56 to 1.24)        | 0.39             | 0.0788  | (-0.045 to 0.83)      |
| Count                |                                                       |         |                       |                  |         |                       |
| Normal Points        | 0.24                                                  | <.0001  | (0.15 to 0.32)        |                  |         |                       |
| Deep Scotoma         | -0.28                                                 | <.0001  | (-0.38 to -0.17)      | -0.26            | <.0001  | (-0.37 to -0.16)      |

eTable 5. Macular Sensitivity in Stargardt Disease and Its Association with Visual Acuity including Patients with Poor Pattern Placement.

MS= mean sensitivity
